# Supplementary material for: Plasma DNA Integrity as a Prognostic Biomarker for Colorectal Cancer Chemotherapy
Source: Hindawi journal article supplement (doi:10.1155/2021/5569783), 2021-05-26

**Table S1. ALU115 and ALU247/115 of serum DNA in subgroups of primary CRC patients.**

| Clinical characteristics   | No | cfDNA (ng/ml)<br>(IQR 25–75) | <i>p</i> | ALU115 (ng/ml)<br>(IQR 25–75) | <i>p</i> | ALU247/ALU115<br>(IQR 25–75) | <i>p</i> |
|----------------------------|----|------------------------------|----------|-------------------------------|----------|------------------------------|----------|
| ALL                        | 76 |                              |          |                               |          |                              |          |
| Sex                        |    |                              | 0.056    |                               | 0.253    |                              | 0.831    |
| Male                       | 49 | 784 (569-1250)               |          | 1015 (625-1865)               |          | 0.206 (0.142-0.284)          |          |
| Female                     | 27 | 1170 (712-1660)              |          | 1455 (1010-1765)              |          | 0186 (0.150-0.348)           |          |
| Age (years)                |    |                              | 0.390    |                               | 0.024*   |                              | 0.977    |
| ≤60                        | 29 | 862 (620-1395)               |          | 975 (560-1583)                |          | 0.195 (0.152-0.301)          |          |
| >60                        | 47 | 966 (600-1420)               |          | 1295 (955-2150)               |          | 0.200 (0.133-0.297)          |          |
| smoking                    |    |                              | 0.115    |                               | 0.052    |                              | 0.499    |
| Yes                        | 20 | 771 (483-1298)               |          | 947.5 (536.3-1499)            |          | 0.211 (0.155-0.329)          |          |
| No                         | 56 | 976 (683-1508)               |          | 1378 (906.3-1974)             |          | 0.185 (0.147-0.289)          |          |
| Tumour size (cm)           |    |                              | 0.246    |                               | 0.240    |                              | 0.107    |
| ≤5                         | 49 | 848 (581-1430)               |          | 1145 (665-1663)               |          | 0.184 (0.131-0.280)          |          |
| >5                         | 27 | 1040 (732-1410)              |          | 1480 (630-2370)               |          | 0.217 (0.160-0.360)          |          |
| TNM                        |    |                              | 0.323    |                               | 0.468    |                              | 0.337    |
| I-II                       | 47 | 848 (582-1330)               |          | 1180 (630-1750)               |          | 0.215 (0.150-0.297)          |          |
| III-IV                     | 38 | 1026 (619.5-1773)            |          | 1430 (667.5-2355)             |          | 0.173 (0.134-0.308)          |          |
| Histologic differentiation |    |                              | 0.245    |                               | 0.250    |                              | 0.652    |
| Low                        | 10 | 914 (612-1463)               |          | 1300 (872.5-2011)             |          | 0.190 (0.126-0.266)          |          |
| Middle                     | 57 | 1030 (613-1500)              |          | 1325 (665-2023)               |          | 0.206 (0.150-0.311)          |          |
| High                       | 9  | 766 (464-898)                |          | 940 (592.5-1323)              |          | 0.200 (0.127-0.354)          |          |

\*P<0.05 was considered significant; IQR, interquartile range; TNM, tumour node metastasis.

FIGURE S1

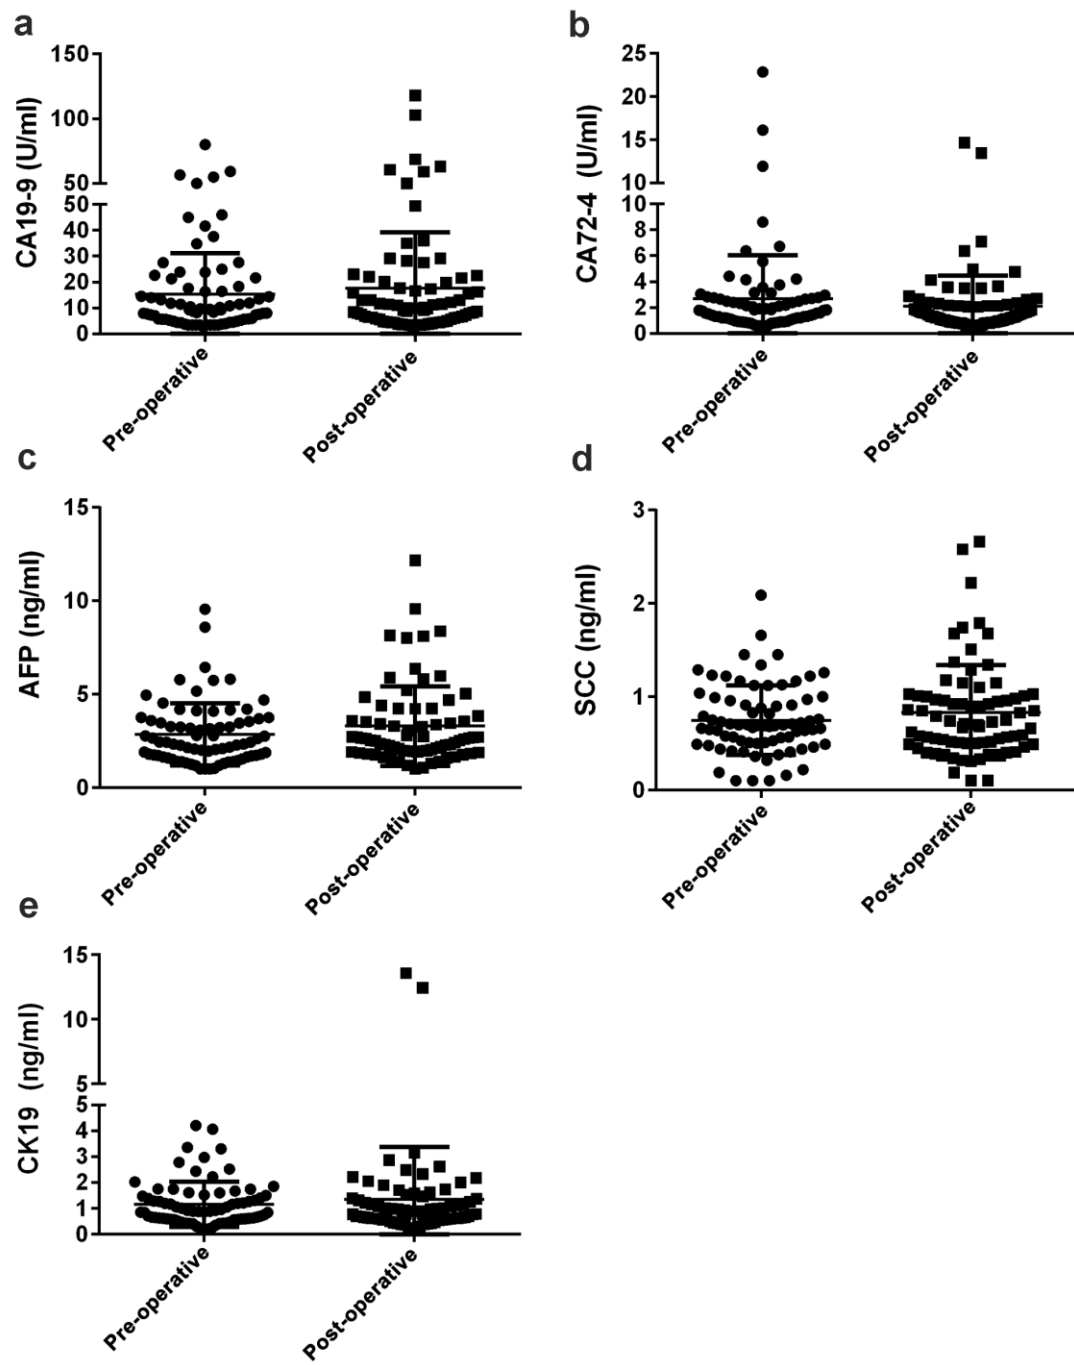

FIGURE S2

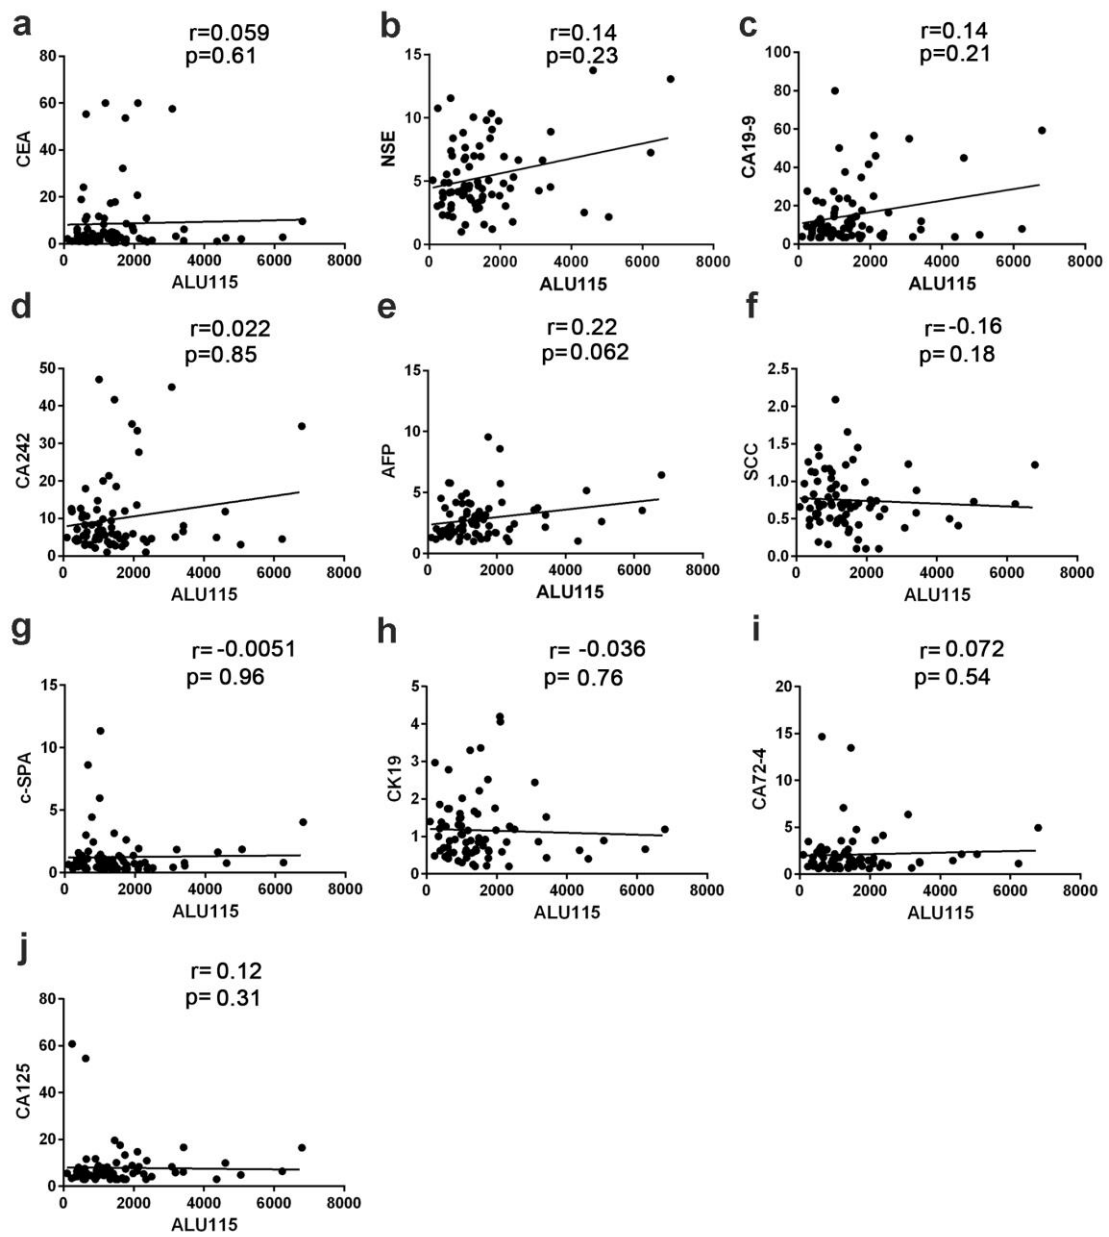

FIGURE S3

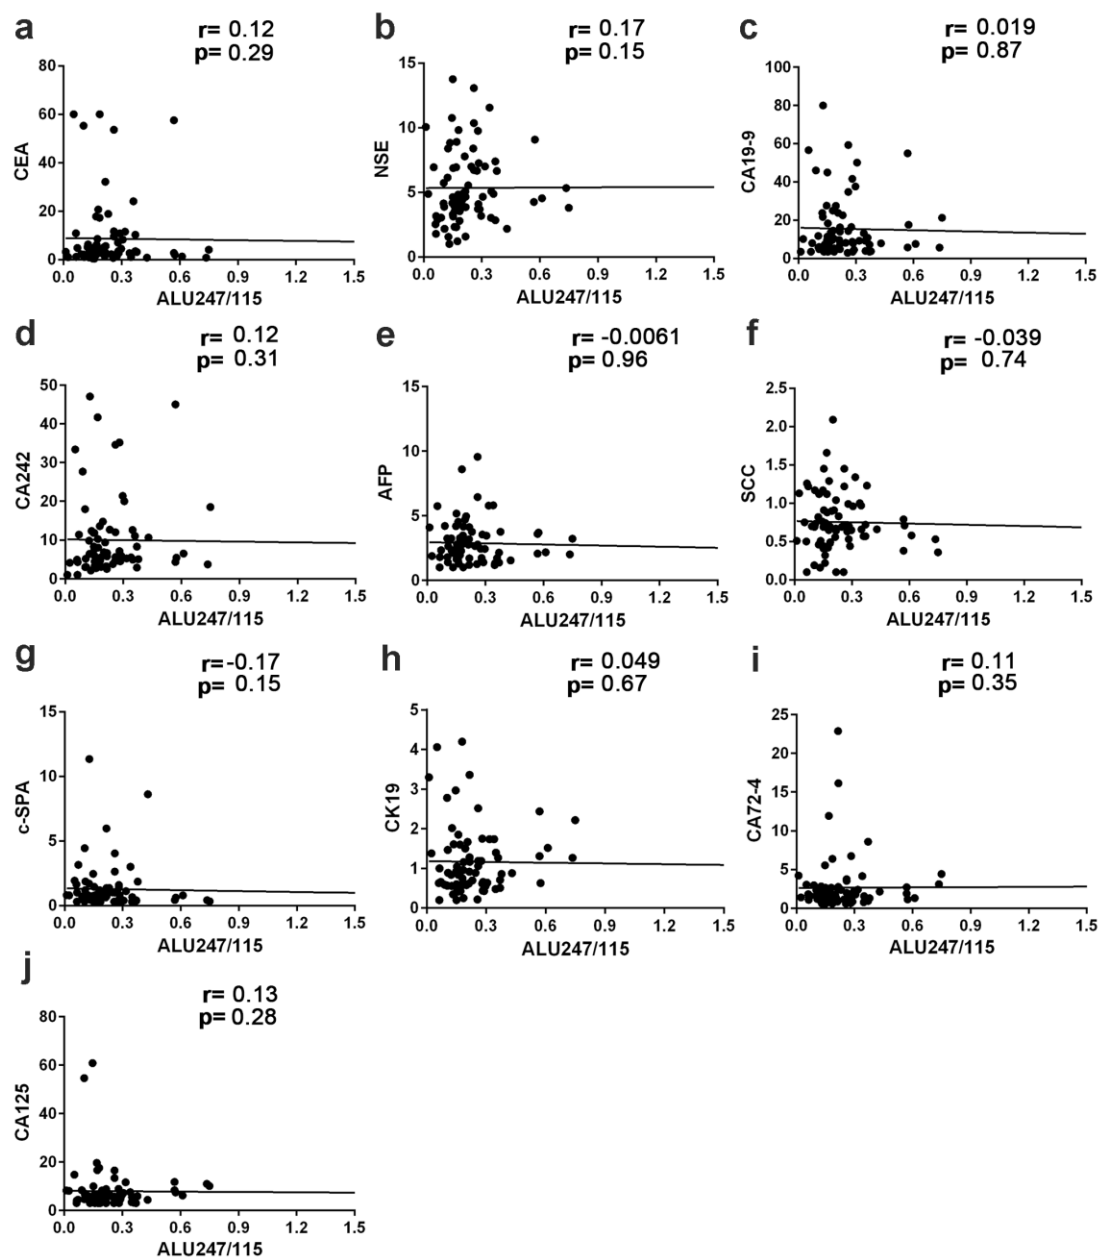

FIGURE S4

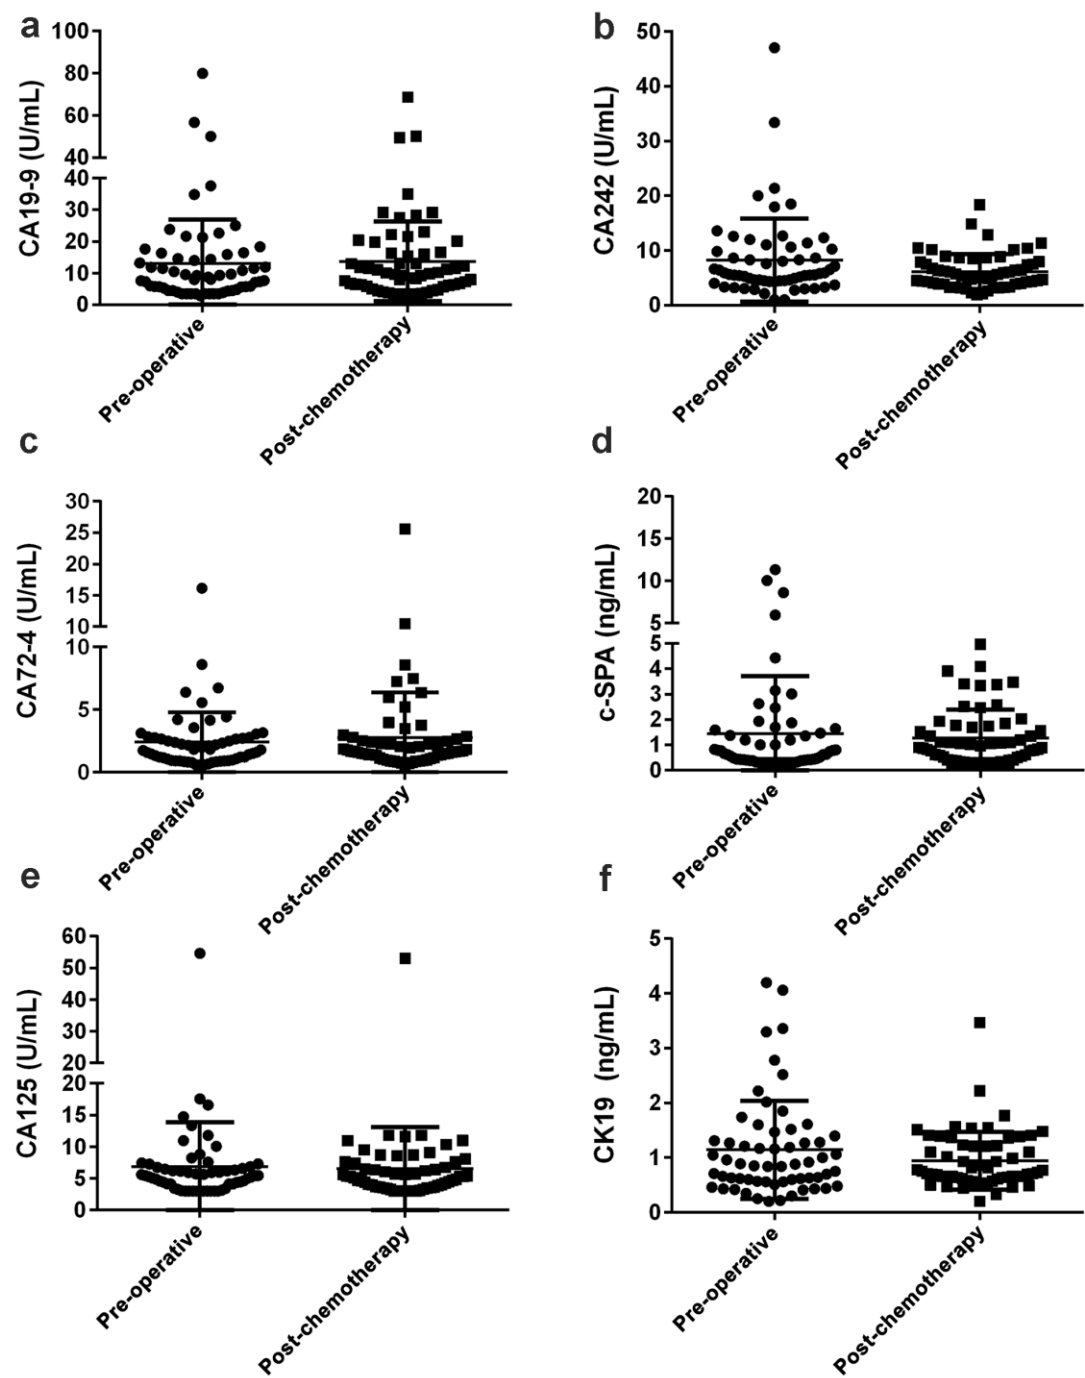

FIGURE S5

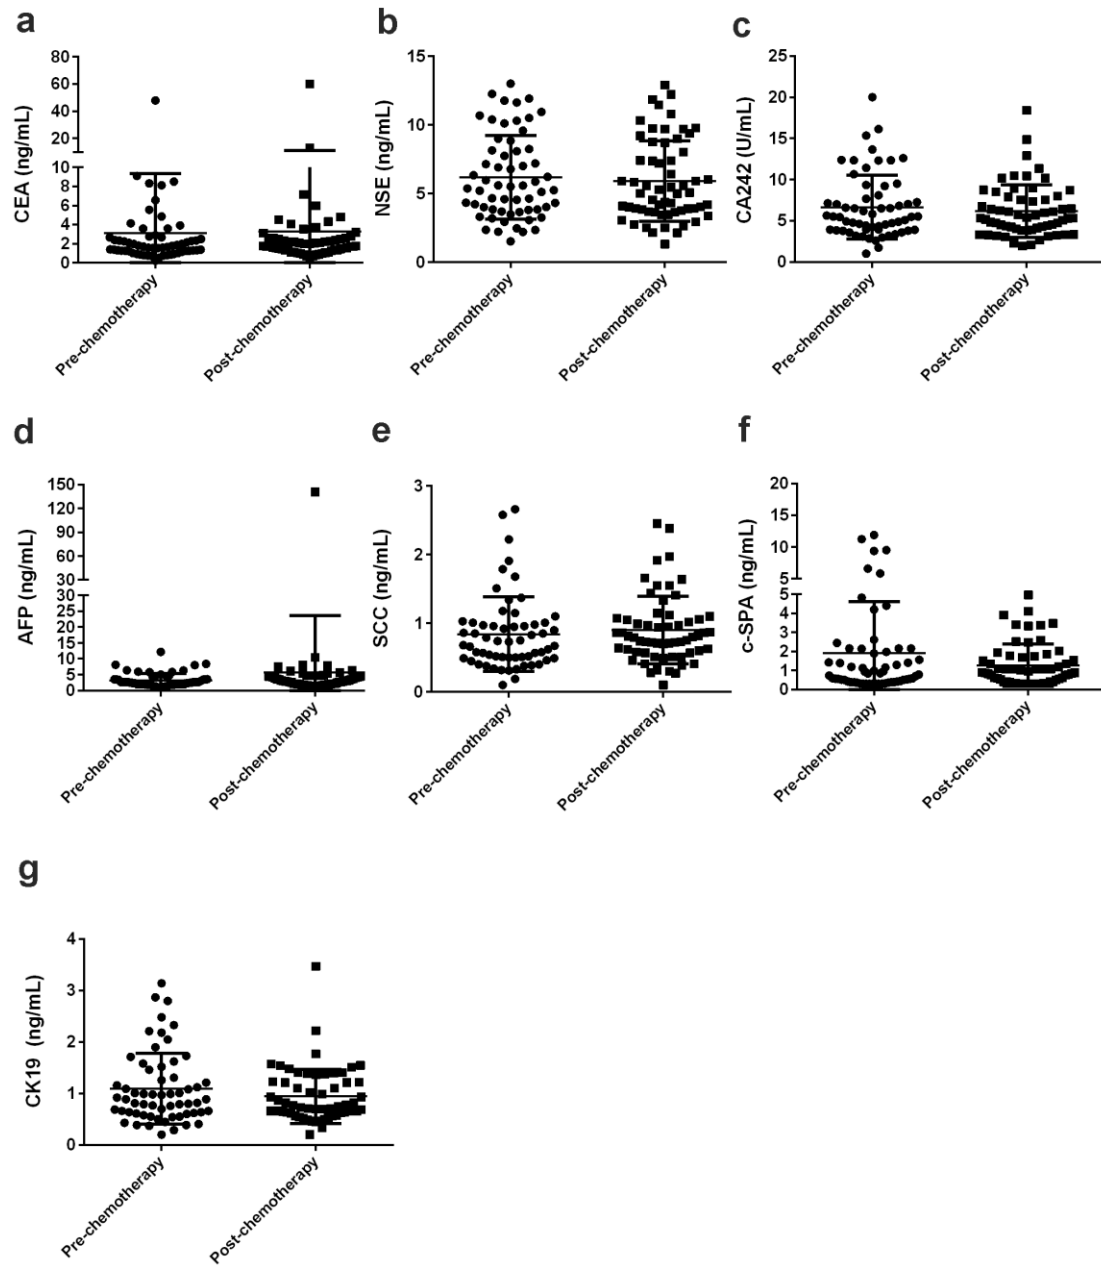

FIGURE S6

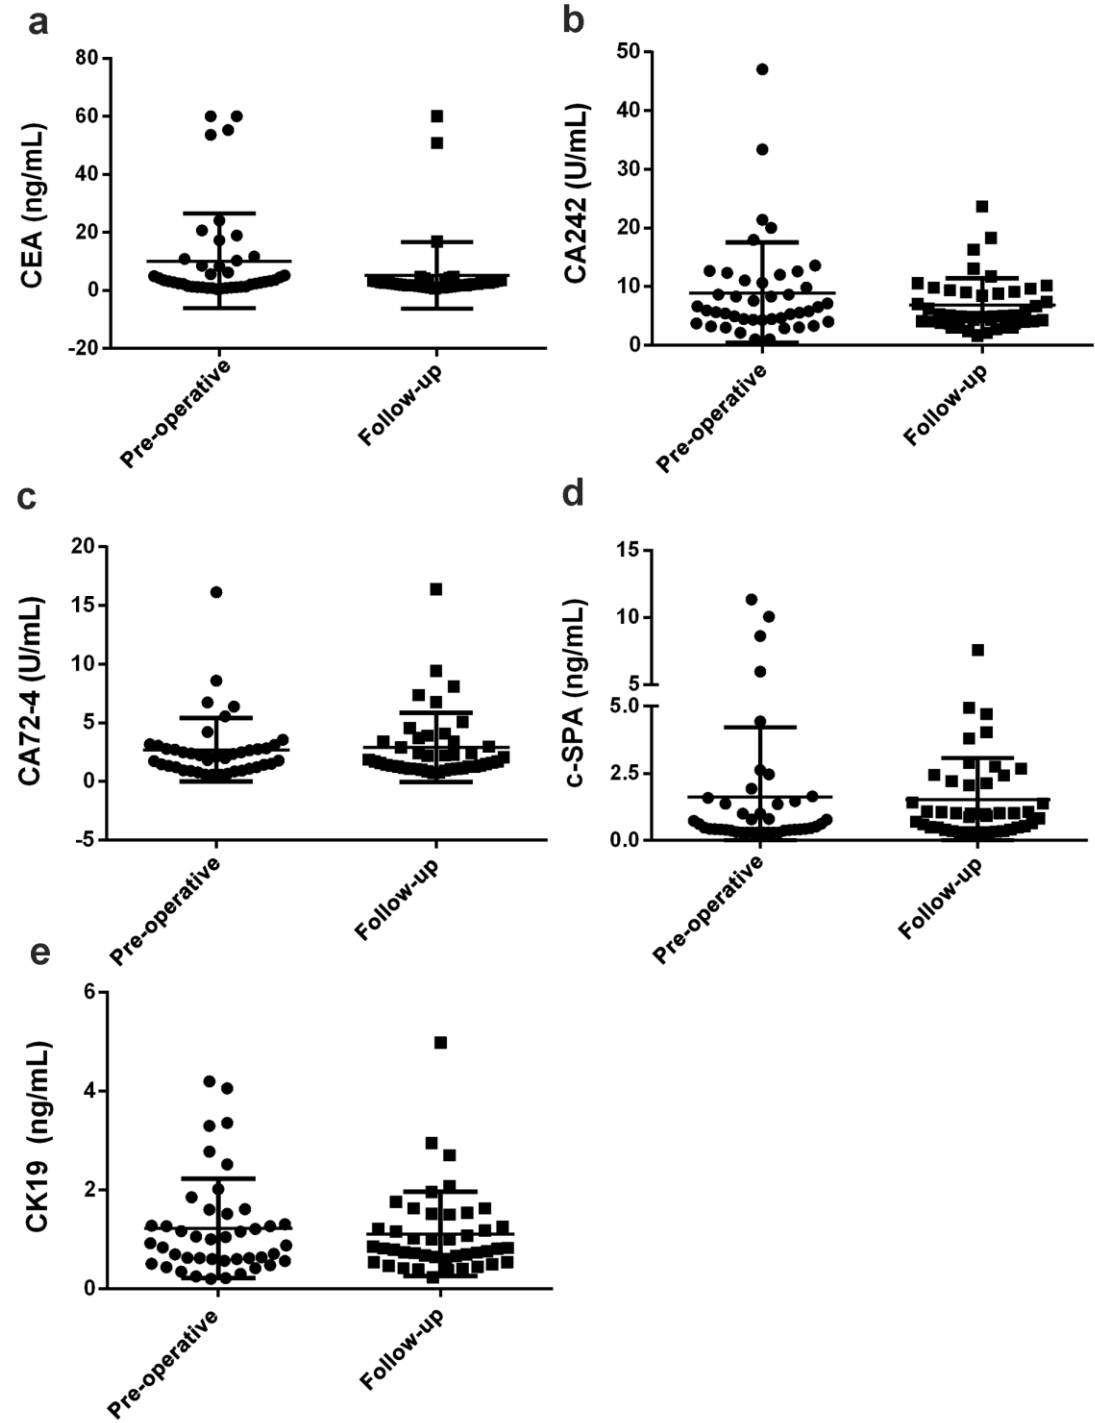

Supplement: f1 [file 5569783.f1.pdf]
